# Supplementary material for: Facile preparation of a tetraethylenepentamine-functionalized nano magnetic composite material and its adsorption mechanism to anions: competition or cooperation
Source: Royal Society of Chemistry journal article supplement (doi:10.1039/c8ra00237a), 2018-01-01
Supplement: c8ra00237a1.pdf [file c8ra00237a1.pdf]

## Electronic Supplementary Material (ESI)

# Facile preparation of tetraethylenepentamine-functionalized nanomagnetic composite material and its adsorption mechanism to anions: Competition or cooperation

Meiqin Hu, Haoyu Shen\*, Si Ye, Yan Wang, Jiali Zhang, Shanshan Lv  
Ningbo Institute of Technology, Zhejiang University; Ningbo, Zhejiang, 315100, China

### S1. Kinetic studies

Fig. S1 presented the adsorption kinetics of mono-component fluoride ion ( $F^-$ ), phosphate or Cr(VI) onto  $nFe_3O_4@TEPA$ . As shown in Fig. S1(a), for all the three kinds of anions, the adsorption capacity increased rapidly and reached equilibrium in 10 min. This revealed that the presence of surface grafting of amino group on adsorbents could effectively shorten the equilibrium time. Besides, the kinetic curve of  $nFe_3O_4@TEPA$  could be divided into two portions, which could be described by intraparticle diffusion model (shown in Fig. S1(b)) and indicated that the intra-particle process<sup>1</sup> might not be involved in the rate-limiting steps. Therefore, in the present case, anions reached the  $nFe_3O_4@TEPA$  easily and took less time to reach adsorption equilibrium, implying that the surface grafting of amino groups and uniform structures of  $nFe_3O_4@TEPA$  allowed efficient mass transport, thus overcoming some drawbacks of traditionally materials.

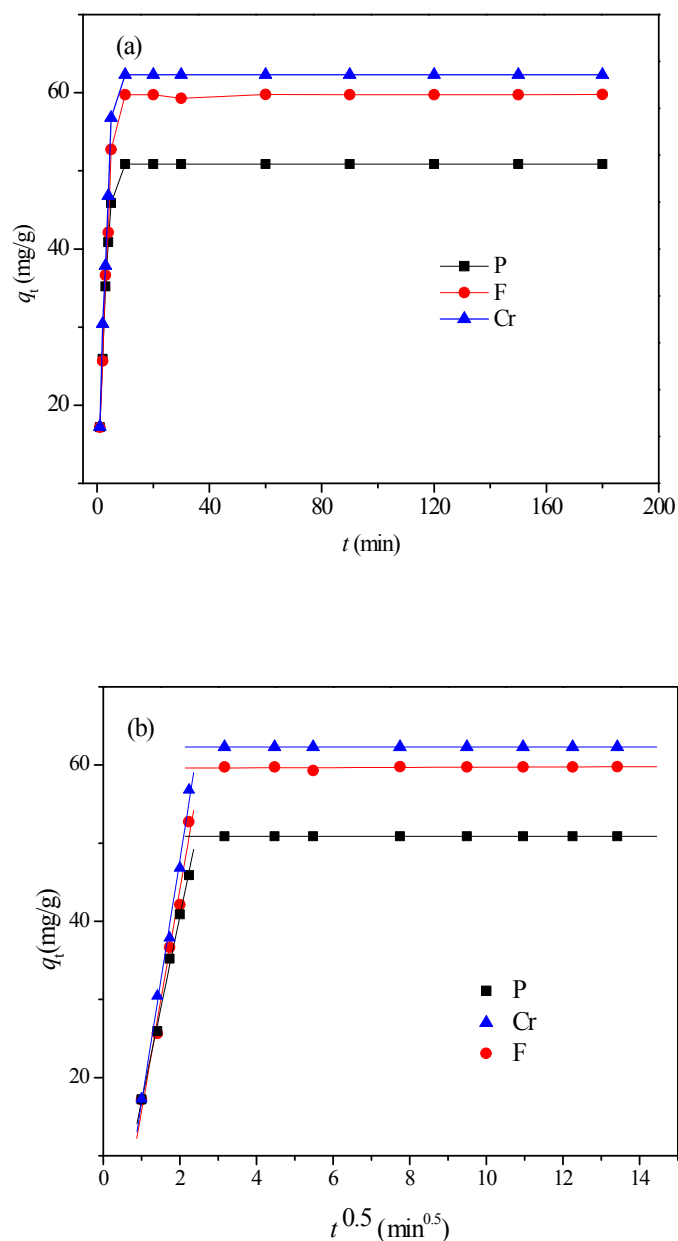

**Fig. S1** Effect of adsorption time on the adsorption of mono-component fluoride ion ( $F^-$ ), phosphate or Cr(VI) onto  $nFe_3O_4@TEPA$

Pseudo-first-order and pseudo-second-order models were used to describe the adsorption kinetic data. The correlation coefficient values indicated a better fit of the pseudo-second-order model with the experimental data compared to the pseudo-first-order for all the studied anions. The equations and constants, including  $k_2$ ,  $q_{e,cal}$ , and initial adsorption rates ( $k_2q_e^2$ ) calculated from the equation, were listed in Table S1. The data exhibit good linearities for all the adsorbents with  $R^2$  above 0.998. The

calculating equilibrium adsorption capacity ( $q_{e,cal}$ ) from the pseudo-second-order model were very close to the experimental ( $q_e$ ).

**Table S1** Pseudo-second-order rate equations and constants of  $n\text{Fe}_3\text{O}_4@\text{TEPA}$  for fluoride ion ( $\text{F}^-$ ), phosphate or  $\text{Cr}(\text{VI})$

| anion                  | equations                   | $k_2$<br>( $\text{g}/(\text{mg} \cdot \text{min})$ ) | $q_e(\text{mg}/\text{g})$ | $q_{e,cal}(\text{mg}/\text{g})$ | $k_2 q_e^2$<br>( $\text{mg}/(\text{g} \cdot \text{min})$ ) | $R^2$  |
|------------------------|-----------------------------|------------------------------------------------------|---------------------------|---------------------------------|------------------------------------------------------------|--------|
| fluoride               | $t/q_t = 0.0166 t + 0.021$  | 0.013                                                | 59.74                     | 60.24                           | 47.61                                                      | 0.9998 |
| phosphate              | $t/q_t = 0.0195 t + 0.0174$ | 0.021                                                | 50.87                     | 51.28                           | 57.47                                                      | 0.9998 |
| $\text{Cr}(\text{VI})$ | $t/q_t = 0.0159 t + 0.0178$ | 0.014                                                | 62.29                     | 62.89                           | 56.18                                                      | 0.9998 |

Adsorption kinetic at different temperatures (25 °C~45 °C) were carried out. The Arrhenius equation was applied to investigate the  $E_a$  for the adsorption process.

$$k = A e^{-E_a/RT} \quad (\text{S1})$$

$k$  refers to the pseudo-second-order rate constant ( $\text{g} \cdot \text{mg}^{-1} \cdot \text{min}^{-1}$ );  $E_a$  is the activation energy of anion adsorption ( $\text{kJ} \cdot \text{mol}^{-1}$ );  $A$  is the pre-exponential factor (frequency factor);  $R$  is the gas constant ( $8.314 \text{ J} \cdot \text{mol}^{-1} \cdot \text{K}^{-1}$ );  $T$  is the adsorption temperature (K). The results of the linear relationships between  $\ln k$  and  $1/T$  were listed in Table S2. With the increasing of temperature, the pseudo-second-order rate constant for all the three kinds of anions increased, which infers that elevated temperature might be favorable a much faster the adsorption rate of  $n\text{Fe}_3\text{O}_4@\text{TEPA}$  to any of the fluoride ion ( $\text{F}^-$ ), phosphate or  $\text{Cr}(\text{VI})$  anion. According to the pseudo-second-order rate constant  $k$  at different temperatures, the activation energies of the adsorption process,  $E_a$ , are found to 19.56 kJ/mol, 23.71 kJ/mol, 25.35 kJ/mol for fluoride ion ( $\text{F}^-$ ), phosphate or  $\text{Cr}(\text{VI})$ , respectively. All are less than 42 kJ/mol, which indicate the diffusion process is the rate-controlled step.<sup>2</sup>

**Table S2** Pseudo-second-order rate constant at different temperatures (25 °C~45 °C), Arrhenius equation and activation energy of anion adsorption

| anion     | $k_2(\text{g}/(\text{mg} \cdot \text{min}))$ |        |       |        |        | Arrhenius equation                            | $E_a$<br>(kJ/mol) |
|-----------|----------------------------------------------|--------|-------|--------|--------|-----------------------------------------------|-------------------|
|           | 298                                          | 303    | 308   | 313    | 318    |                                               |                   |
| fluoride  | 0.0102                                       | 0.0116 | 0.013 | 0.0148 | 0.0168 | $\ln k = 3.3046 - 2352.3/TR^2 = 0.9989$       | 19.56             |
| phosphate | 0.016                                        | 0.019  | 0.021 | 0.026  | 0.029  | $\ln k = 5.4414 - 2851.3/T$<br>$R^2 = 0.997$  | 23.71             |
| Cr(VI)    | 0.0098                                       | 0.0118 | 0.014 | 0.016  | 0.0188 | $\ln k = 5.6147 - 3048.6/T$<br>$R^2 = 0.9982$ | 25.35             |

## S2. Adsorption capacity of $n\text{Fe}_3\text{O}_4@\text{TEPA}$ to anions

The adsorption capacities of  $n\text{Fe}_3\text{O}_4@\text{TEPA}$  to fluoride ion ( $\text{F}^-$ ), phosphate or Cr(VI) mono-component were investigated by varying the initial concentration of each anion solutions from 50.0 mg/L to 1000 mg/L. Fig. S2 shows that the adsorption capacities of  $n\text{Fe}_3\text{O}_4@\text{TEPA}$  to any of fluoride ion ( $\text{F}^-$ ), phosphate or Cr(VI) increased with the increasing of the initial concentration of the studied anions. The represented parameters using Langmuir and Freundlich adsorption models indicated that for any of the anions, the Langmuir models fit better than those of Freundlich isotherms, suggesting a monolayer adsorption. Table S3 presented the Langmuir and Freundlich isotherm parameters as well as the correlation coefficients ( $R^2$ ) of the adsorption data in the equations.

**Table S3** Langmuir and Freundlich isotherm equations and corresponding constants

| anion     | Langmuir isotherm                                 | Langmuir constants |                     | $q_m^b$<br>(mg/L) | Freundlich isotherm                                     | Freundlich constants |       |
|-----------|---------------------------------------------------|--------------------|---------------------|-------------------|---------------------------------------------------------|----------------------|-------|
|           |                                                   | $K_L$<br>(L/mg)    | $q_{m,c}$<br>(mg/L) |                   |                                                         | $K_F$                | $1/n$ |
| fluoride  | $C_e/q_e = 0.0061 C_e + 0.1513$<br>$R^2 = 0.996$  | 0.04               | 163.9               | 163.5             | $\log q_e = 0.1345 \log C_e + 1.8196$<br>$R^2 = 0.8844$ | 66.0                 | 0.135 |
| phosphate | $C_e/q_e = 0.0067 C_e + 0.1794$<br>$R^2 = 0.998$  | 0.037              | 149.3               | 142.5             | $\log q_e = 0.2738 \log C_e + 1.448$<br>$R^2 = 0.7117$  | 28.1                 | 0.274 |
| Cr(VI)    | $C_e/q_e = 0.0025 C_e + 0.0164$<br>$R^2 = 0.9996$ | 0.152              | 400                 | 402.4             | $\log q_e = 0.2382 \log C_e + 2.0426$<br>$R^2 = 0.663$  | 110.3                | 0.238 |

<sup>b</sup> $q_m$  obtained at an initial concentration of 1000.0 mg/L of each ion.

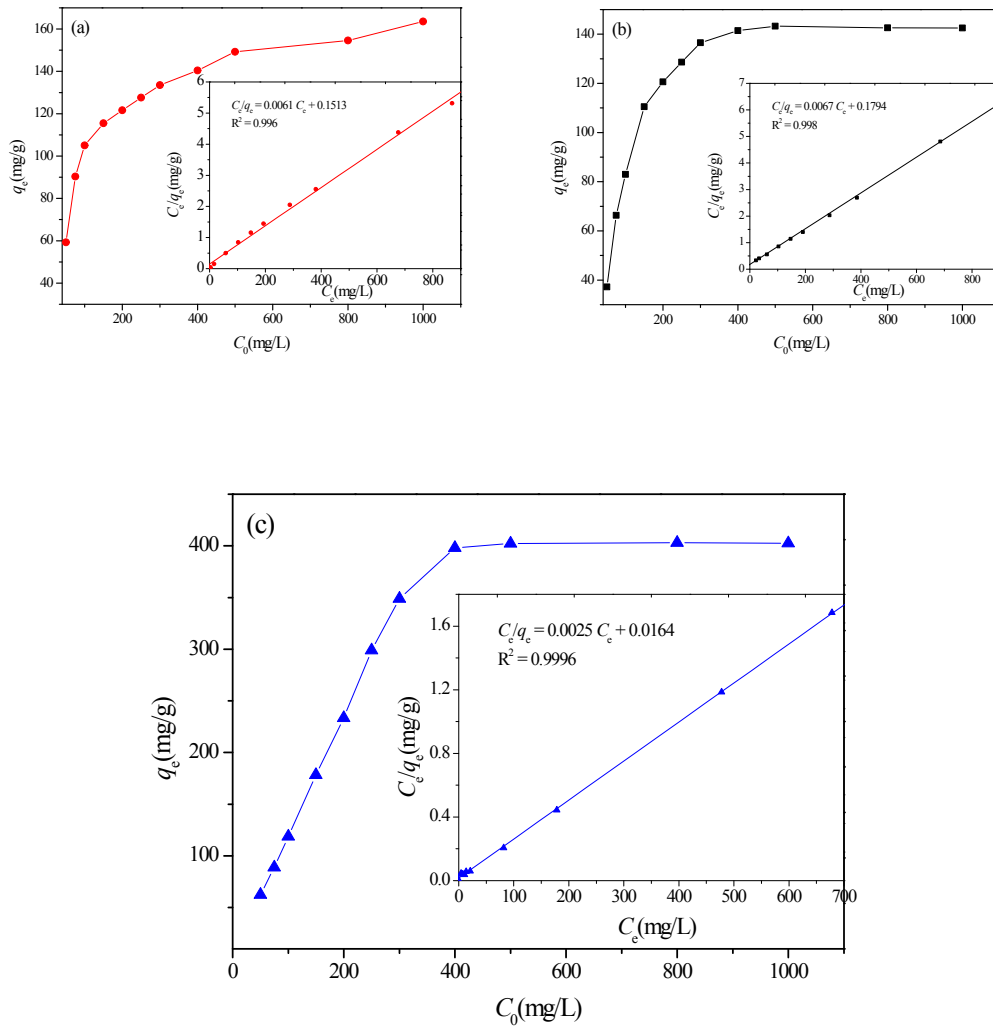

**Fig. S2** Adsorption isotherms of mono-component fluoride ion ( $F^-$ ), phosphate or  $Cr(VI)$  on the  $Fe_3O_4@TEPA$

The thermodynamic parameters, *i.e.*, standard free energy change ( $\Delta G^\theta$ ), enthalpy change ( $\Delta H^\theta$ ), and entropy change ( $\Delta S^\theta$ ), were estimated to evaluate the feasibility and exothermic nature of the adsorption process. The Gibb's free energy change of the process is related to equilibrium constant by eq. (S2):

$$\Delta G^\theta = -RT \ln K_D \quad (S2)$$

where  $K_D$  is the distribution coefficient, which is defined as eq. (S3),

$$K_D = \frac{q_e}{C_e} = \frac{\text{Amount of anions adsorbed on } Fe_3O_4@TEPA}{\text{Amount of anions in solution}} \times \frac{V}{m} \quad (S3)$$

According to thermodynamics, the Gibb's free energy change ( $\Delta G^\theta$ ) is also

related to the enthalpy change ( $\Delta H^\theta$ ) and entropy change ( $\Delta S^\theta$ ) at constant temperature by eq. (S4):

$$\Delta G^\theta = \Delta H^\theta - T\Delta S^\theta \quad (\text{S4})$$

Thus, 
$$\ln K_D = \frac{\Delta S^\theta}{R} - \frac{\Delta H^\theta}{RT} \quad (\text{S5})$$

The values of enthalpy change ( $\Delta H^\theta$ ) and entropy change ( $\Delta S^\theta$ ) were calculated from the slope and intercept of the plot of  $\ln K_D$  vs ( $1/T$ ). The results were given in Table S3. As listed in Table 4, the enthalpy changes ( $\Delta H^\theta$ ) for the fluoride ion ( $F^-$ ), phosphate or Cr(VI) were found to be at 38.54, 13.89, 88.03 kJ/mol, respectively, which indicated that the adsorption was endothermic. The entropy changes ( $\Delta S^\theta$ ) were at 151.2, 50.2, 333.5 J/(mol·K), respectively. The values of  $\Delta G^\theta$  were negative for the  $nFe_3O_4@TEPA$  to all the studied anions, implying the spontaneous nature of the adsorption process.

**Table S4** Thermodynamic parameters for adsorption of  $nFe_3O_4@TEPA$  to fluoride ion ( $F^-$ ), phosphate or Cr(VI) at different temperature (25 °C~45 °C)

| anion     | Thermodynamic equation                         | $\Delta G$ (kJ/mol) | $\Delta H$ (kJ/mol) | $\Delta S$ (J/(mol·K)) |
|-----------|------------------------------------------------|---------------------|---------------------|------------------------|
| fluoride  | $\ln K = -4635.2/T + 18.183$<br>$R^2 = 0.9976$ | -6.47~-9.52         | 38.54               | 151.2                  |
| phosphate | $\ln K = -1671.4/T + 6.0366$<br>$R^2 = 0.9983$ | -1.06~-2.05         | 13.89               | 50.2                   |
| Cr(VI)    | $\ln K = -10588/T + 40.231$<br>$R^2 = 0.9967$  | -11.6~-18.3         | 88.03               | 333.5                  |

**S3. Quadratic models for the adsorption capacity of the fluoride ion ( $F^-$ ), phosphate or Cr(VI), based on BBD of RSM:**

$$q(\text{Cr}) = 196.35 + 148.22 \times C(\text{Cr(VI)}) + 1.42 \times C(\text{F}^-) - 9.63 \times C(\text{P}) + 5.67 \times C(\text{Cr(VI)}) \times C(\text{F}^-) - 2.25 \times C(\text{Cr(VI)}) \times C(\text{P}) - 8.50 \times C(\text{F}^-) \times C(\text{P}) + 3.36 \times C(\text{Cr(VI)})^2 - 10.79 \times C(\text{F}^-)^2 + 1.29 \times C(\text{P})^2 \quad (\text{S6})$$

$$q(F)=110.49-0.30\times C(\text{Cr(VI)})+39.49\times C(F^-)-5.31\times C(P)-8.18\times C(\text{Cr(VI)})\times C(F^-) \\ +1.45\times C(\text{Cr(VI)})\times C(P)-7.39\times C(F^-)\times C(P)+0.65\times C(\text{Cr(VI)})^2-36.22\times C(F^-)^2+0.91\times C(P)^2 \quad (\text{S7})$$

$$q(P)=80.80-7.16\times C(\text{Cr(VI)})-4.40\times C(F^-)+38.30\times C(P)+6.25\times C(\text{Cr(VI)})\times C(F^-)-8.50 \\ \times C(\text{Cr(VI)})\times C(P)-4.99\times C(F^-)\times C(P)+5.53\times C(\text{Cr(VI)})^2+11.12\times C(F^-)^2-23.27\times C(P)^2 \quad (\text{S8})$$

#### S4. Analysis of variance (ANOVA) for the selected quadratic model

**Table S5** Process variables and their level for the adsorption of co-existing ions by BBD

| Factors name        | Factors code | Level of factors |     |     |
|---------------------|--------------|------------------|-----|-----|
|                     |              | -1               | 0   | 1   |
| $C_0$ Cr(VI) (mg/L) | $X_1$        | 10               | 180 | 350 |
| $C_0$ $F^-$ (mg/L)  | $X_2$        | 10               | 180 | 350 |
| $C_0$ P (mg/L)      | $X_3$        | 10               | 180 | 350 |

**Table S6** Experimental design matrix and response

| No | Code value |       |       | Actual value               |                           |                       | $q$ Cr(VI)<br>(mg/g) | $q$ $F^-$<br>(mg/g) | $q$ P<br>(mg/g) |
|----|------------|-------|-------|----------------------------|---------------------------|-----------------------|----------------------|---------------------|-----------------|
|    | $X_1$      | $X_2$ | $X_3$ | $X_1 C_0$ Cr(VI)<br>(mg/L) | $X_2 C_0$ $F^-$<br>(mg/L) | $X_3 C_0$ P<br>(mg/L) |                      |                     |                 |
| 1  | 0          | +1    | -1    | 180                        | 350                       | 10                    | 210.35               | 132.42              | 27.29           |
| 2  | 0          | -1    | +1    | 180                        | 10                        | 350                   | 180.35               | 32.71               | 120.13          |
| 3  | 0          | +1    | +1    | 180                        | 350                       | 350                   | 160.35               | 102.42              | 100.2           |
| 4  | +1         | 0     | +1    | 350                        | 180                       | 350                   | 350.67               | 112.49              | 80.2            |
| 5  | +1         | -1    | 0     | 350                        | 10                        | 180                   | 320.67               | 43.77               | 90.2            |
| 6  | 0          | 0     | 0     | 180                        | 180                       | 180                   | 196.35               | 110.49              | 80.8            |
| 7  | +1         | 0     | -1    | 350                        | 180                       | 10                    | 360.68               | 115.6               | 26.8            |
| 8  | +1         | +1    | 0     | 350                        | 350                       | 180                   | 340.68               | 100.86              | 95.2            |
| 9  | -1         | -1    | 0     | 10                         | 10                        | 180                   | 48.48                | 32.6                | 112.2           |
| 10 | -1         | 0     | +1    | 10                         | 180                       | 350                   | 45.82                | 105.6               | 116.32          |
| 11 | 0          | 0     | 0     | 180                        | 180                       | 180                   | 196.35               | 110.49              | 80.8            |
| 12 | 0          | 0     | 0     | 180                        | 180                       | 180                   | 196.35               | 110.49              | 80.8            |
| 13 | 0          | 0     | 0     | 180                        | 180                       | 180                   | 196.35               | 110.49              | 80.8            |
| 14 | -1         | 0     | -1    | 10                         | 180                       | 10                    | 46.82                | 114.49              | 28.92           |
| 15 | 0          | -1    | -1    | 180                        | 10                        | 10                    | 196.35               | 33.16               | 27.32           |
| 16 | -1         | +1    | 0     | 10                         | 350                       | 180                   | 45.82                | 122.42              | 92.2            |
| 17 | 0          | 0     | 0     | 180                        | 180                       | 180                   | 196.35               | 110.49              | 80.8            |

**Table S7** ANOVA for Response Surface Quadratic Model (Response1 q(Cr))

| Source               | Sum of Squares    | df       | Mean Square       | F Value        | p-value<br>Prob > F |             |
|----------------------|-------------------|----------|-------------------|----------------|---------------------|-------------|
| Model                | 1.775E+005        | 9        | 19719.45          | 177.03         | < 0.0001            | significant |
| <i>A-C(Cr(VI))</i>   | <i>1.758E+005</i> | <i>1</i> | <i>1.758E+005</i> | <i>1577.81</i> | <i>&lt; 0.0001</i>  | <i>*</i>    |
| <i>B-C(F-)</i>       | <i>16.10</i>      | <i>1</i> | <i>16.10</i>      | <i>0.14</i>    | <i>0.7151</i>       |             |
| <i>C-C(P)</i>        | <i>741.32</i>     | <i>1</i> | <i>741.32</i>     | <i>6.66</i>    | <i>0.0365</i>       | <i>*</i>    |
| <i>AB</i>            | <i>128.48</i>     | <i>1</i> | <i>128.48</i>     | <i>1.15</i>    | <i>0.3185</i>       |             |
| <i>AC</i>            | <i>20.30</i>      | <i>1</i> | <i>20.30</i>      | <i>0.18</i>    | <i>0.6823</i>       |             |
| <i>BC</i>            | <i>289.00</i>     | <i>1</i> | <i>289.00</i>     | <i>2.59</i>    | <i>0.1513</i>       |             |
| <i>A<sup>2</sup></i> | <i>47.39</i>      | <i>1</i> | <i>47.39</i>      | <i>0.43</i>    | <i>0.5350</i>       |             |
| <i>B<sup>2</sup></i> | <i>490.43</i>     | <i>1</i> | <i>490.43</i>     | <i>4.40</i>    | <i>0.0741</i>       |             |
| <i>C<sup>2</sup></i> | <i>7.03</i>       | <i>1</i> | <i>7.03</i>       | <i>0.063</i>   | <i>0.8088</i>       |             |
| Residual             | 779.73            | 7        | 111.39            |                |                     |             |
| <i>Lack of Fit</i>   | <i>779.73</i>     | <i>3</i> | <i>259.91</i>     |                |                     |             |
| <i>Pure Error</i>    | <i>0.000</i>      | <i>4</i> | <i>0.000</i>      |                |                     |             |
| Cor Total            | 1.783E+005        | 16       |                   |                |                     |             |

$R^2 = 0.9956$ ,  $Adj R^2 = 0.9900$ ,  $Pred R^2 = 0.9300$ , Adeq Precision = 40.107

\* significant

**Table S8** ANOVA for Response Surface Quadratic Model (Response 2 q(F))

| Source               | Sum of Squares  | Mean Square | F Value         | p-value<br>Prob > F |                    |             |
|----------------------|-----------------|-------------|-----------------|---------------------|--------------------|-------------|
| Model                | 18728.99        | 9           | 2081.00         | 100.01              | < 0.0001           | significant |
| <i>A-C(Cr(VI))</i>   | <i>0.71</i>     | <i>1</i>    | <i>0.71</i>     | <i>0.034</i>        | <i>0.8583</i>      |             |
| <i>B-C(F-)</i>       | <i>12472.52</i> | <i>1</i>    | <i>12472.52</i> | <i>599.41</i>       | <i>&lt; 0.0001</i> | <i>*</i>    |
| <i>C-C(P)</i>        | <i>225.25</i>   | <i>1</i>    | <i>225.25</i>   | <i>10.83</i>        | <i>0.0133</i>      | <i>*</i>    |
| <i>AB</i>            | <i>267.81</i>   | <i>1</i>    | <i>267.81</i>   | <i>12.87</i>        | <i>0.0089</i>      | <i>*</i>    |
| <i>AC</i>            | <i>8.35</i>     | <i>1</i>    | <i>8.35</i>     | <i>0.40</i>         | <i>0.5465</i>      |             |
| <i>BC</i>            | <i>218.30</i>   | <i>1</i>    | <i>218.30</i>   | <i>10.49</i>        | <i>0.0143</i>      | <i>*</i>    |
| <i>A<sup>2</sup></i> | <i>1.75</i>     | <i>1</i>    | <i>1.75</i>     | <i>0.084</i>        | <i>0.7801</i>      |             |
| <i>B<sup>2</sup></i> | <i>5524.50</i>  | <i>1</i>    | <i>5524.50</i>  | <i>265.50</i>       | <i>&lt; 0.0001</i> | <i>*</i>    |
| <i>C<sup>2</sup></i> | <i>3.49</i>     | <i>1</i>    | <i>3.49</i>     | <i>0.17</i>         | <i>0.6945</i>      |             |
| Residual             | 145.65          | 7           | 20.81           |                     |                    |             |
| <i>Lack of Fit</i>   | <i>145.65</i>   | <i>3</i>    | <i>48.55</i>    |                     |                    |             |
| <i>Pure Error</i>    | <i>0.000</i>    | <i>4</i>    | <i>0.000</i>    |                     |                    |             |
| Cor Total            | 18874.65        | 16          |                 |                     |                    |             |

$R^2 = 0.9923$ ,  $Adj R^2 = 0.9824$ ,  $Pred R^2 = 0.8765$ , Adeq Precision = 28.530;

\* significant

**Table S9** ANOVA for Response Surface Quadratic Model (Response 3 q(P))



| Source               | Sum of Squares | df | Mean Square | F Value | p-value Prob > F |             |
|----------------------|----------------|----|-------------|---------|------------------|-------------|
| Model                | 15636.11       | 9  | 1737.35     | 96.19   | < 0.0001         | significant |
| <i>A-C(Cr(VI))</i>   | 409.55         | 1  | 409.55      | 22.67   | 0.0021           | *           |
| <i>B-C(F-)</i>       | 155.06         | 1  | 155.06      | 8.58    | 0.0220           | *           |
| <i>C-C(P)</i>        | 11733.59       | 1  | 11733.59    | 649.63  | < 0.0001         | *           |
| <i>AB</i>            | 156.25         | 1  | 156.25      | 8.65    | 0.0217           | *           |
| <i>AC</i>            | 289.00         | 1  | 289.00      | 16.00   | 0.0052           | *           |
| <i>BC</i>            | 99.80          | 1  | 99.80       | 5.53    | 0.0510           |             |
| <i>A<sup>2</sup></i> | 128.65         | 1  | 128.65      | 7.12    | 0.0321           | *           |
| <i>B<sup>2</sup></i> | 520.88         | 1  | 520.88      | 28.84   | 0.0010           | *           |
| <i>C<sup>2</sup></i> | 2279.48        | 1  | 2279.48     | 126.20  | < 0.0001         | *           |
| Residual             | 126.43         | 7  | 18.06       |         |                  |             |
| <i>Lack of Fit</i>   | 126.43         | 3  | 42.14       |         |                  |             |
| <i>Pure Error</i>    | 0.000          | 4  | 0.000       |         |                  |             |
| Cor Total            | 15762.54       | 16 |             |         |                  |             |

$R^2 = 0.9920$ ,  $Adj R^2 = 0.9817$ ,  $Pred R^2 = 0.8717$ , Adeq Precision = 28.714

\* significant

**Table S10** The relative percentages of the main elements relatively weight (w%) of  $nFe_3O_4@TEPA$  before and after adsorption

| Elements relatively weight (w%) | before adsorption | after adsorption |
|---------------------------------|-------------------|------------------|
| Fe 2p                           | 29.28             | 28.62            |
| O 1s                            | 26.02             | 25.12            |
| N 1s                            | 17.52             | 15.65            |
| C 1s                            | 27.23             | 27.03            |
| Cr 2P                           | 0                 | 1.88             |
| P 2p                            | 0                 | 1.01             |
| F 1s                            | 0                 | 0.78             |

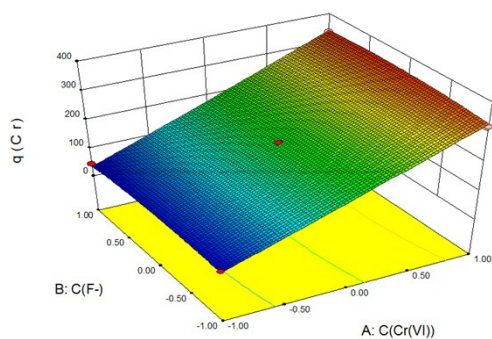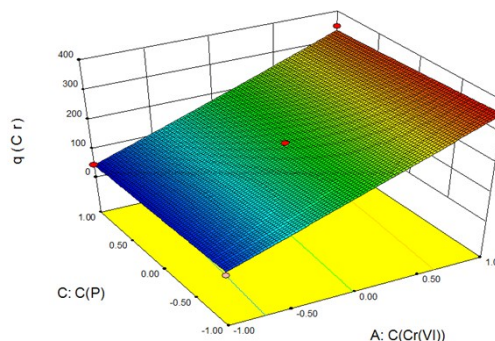

(a) (b)

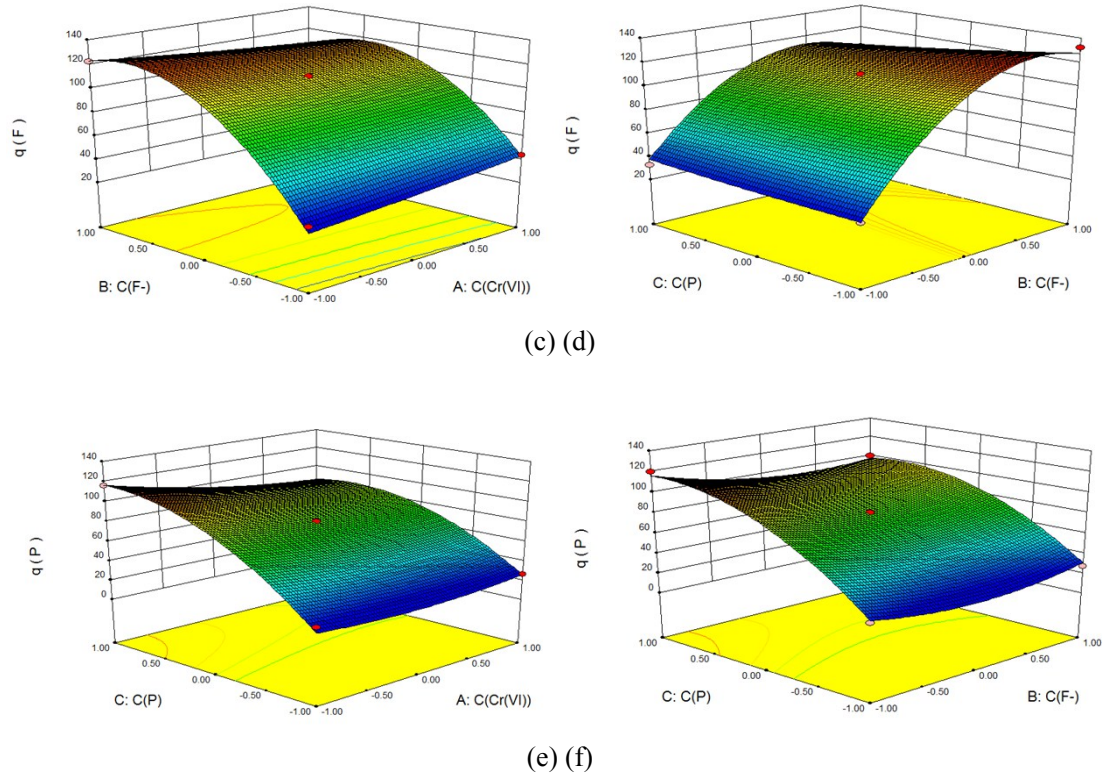

**Fig. S3** The effect of the co-existing fluoride ion to the adsorption of Cr(VI) (a), the effect of the co-existing phosphate to the adsorption of Cr(VI) (b), the effect of the co-existing Cr(VI) to the adsorption of fluoride ion (c), the effect of the co-existing phosphate to the adsorption of fluoride ion (d), the effect of the co-existing Cr(VI) to the adsorption of phosphate (e), the effect of the co-existing fluoride ion to the adsorption of phosphate (f)

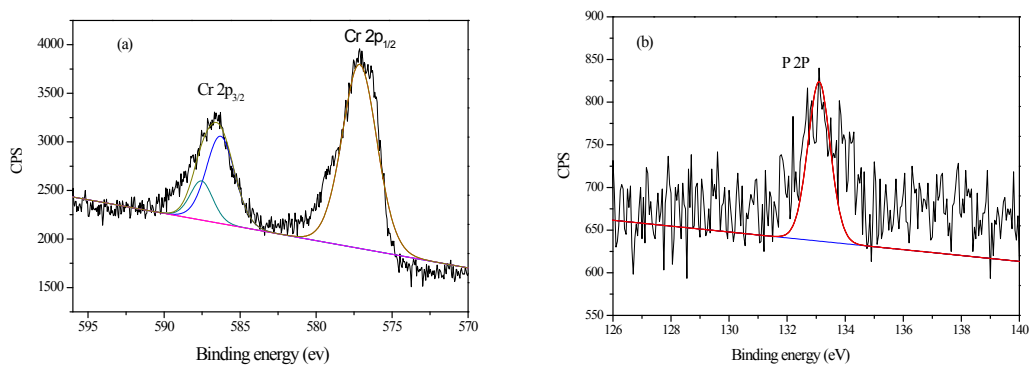

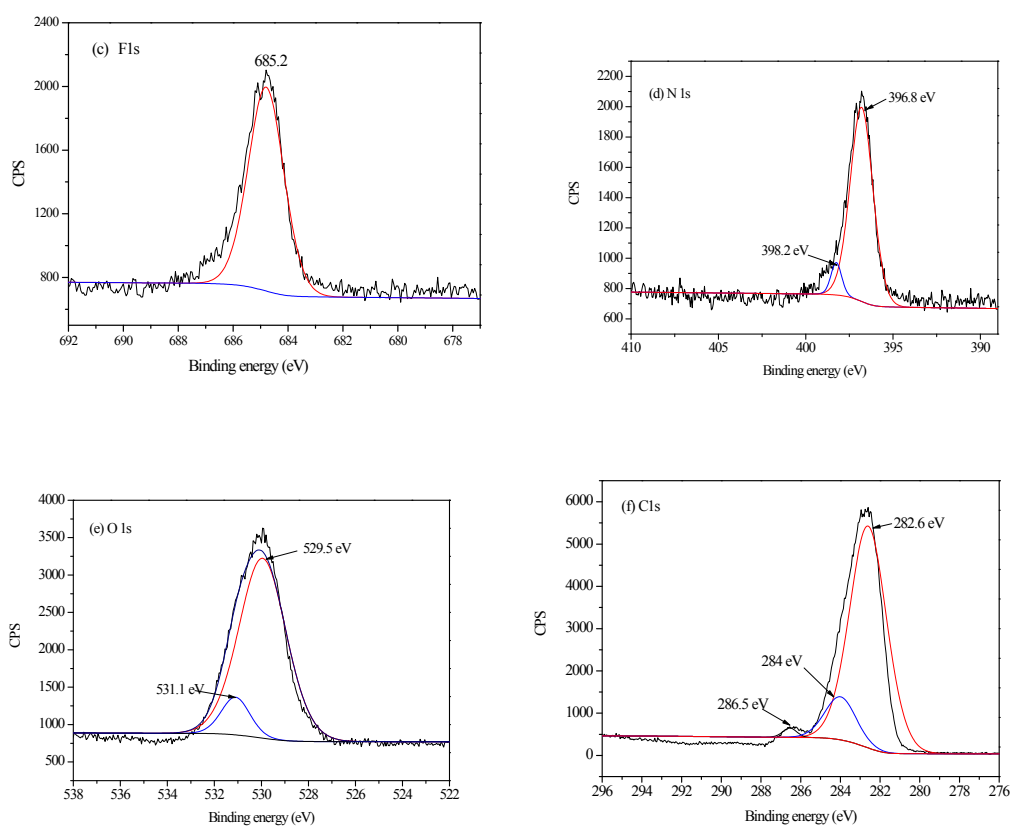

**Fig.S4** High-resolution XPS spectra of  $n\text{Fe}_3\text{O}_4@\text{TEPA}$  after adsorption of the co-existing the three anions (a) Cr2P; (b)P1p; (c) F1s; (d) N1s; (e) O1; (f) C1s.
